# Supplementary material for: Graphene and metal–organic framework hybrids for high-performance sensors for lung cancer biomarker detection supported by machine learning augmentation
Source: Royal Society of Chemistry journal article supplement (doi:10.1039/d4nr00174e), 2024-01-01
Supplement: d4nr00174e1.pdf [file d4nr00174e1.pdf]

## Supplementary Information (SI)

### Graphene and Metal-Organic Frameworks Hybrids for High-Performance Sensors for Lung Cancer Biomarkers Detection supported by Machine Learning Augmentation

Trong Tuan Anh Tran<sup>a</sup>, Kamrul Hassan<sup>a</sup>, Tran Thanh Tung<sup>a</sup>, Ashis Tripathy<sup>b</sup>, Ashok Mondal<sup>b</sup>, and Dusan Losic<sup>a</sup>

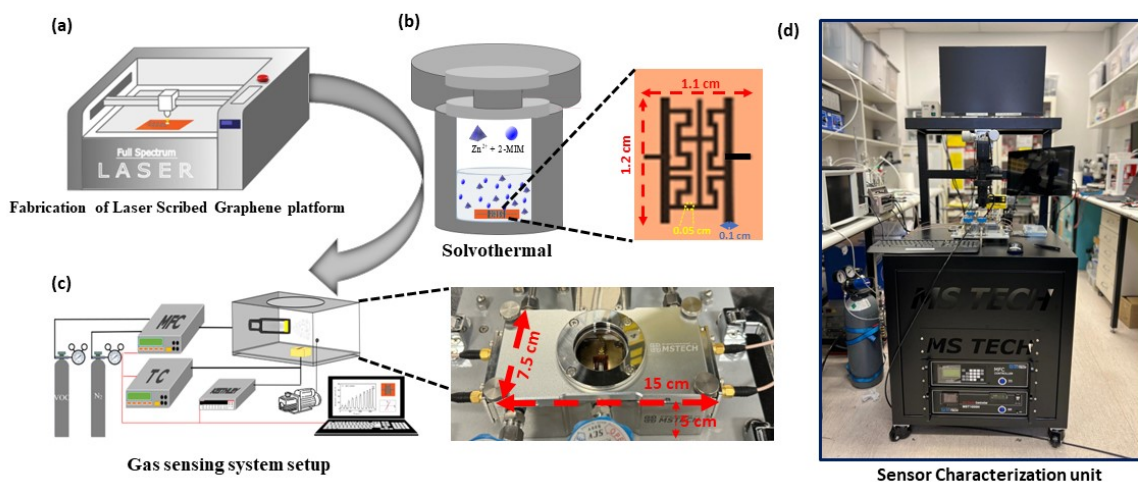

**Figure S1 Schematic for ZIF-8@LSG sensor fabrication a) Laser scribing process to fabrication LSG electrode, b) Solvothermal method to grow ZIF-8 on LSG with detail size parameters of sensor, c) Gas sensing setup with detail size dimensions, d) Realistic photographic images of gas sensing set up.**

**Description:** Figure S1 depicts the ZIF-8@LSG sensor fabrication process. To be more specific, schematic of 3 main steps to fabricate ZIF-8@LSG are illustrated in Figure S1a,b,c, which includes laser scribing step, solvothermal step and gas sensing step. Sensors was designed based on Hibert space filling design with detail size parameter showing in Figure S1b whereas the gas chamber is 7.5 cm in width, 15cm in length and 5cm in height. The full gas sensing setup is showcased in photographical images from Figure S1d.

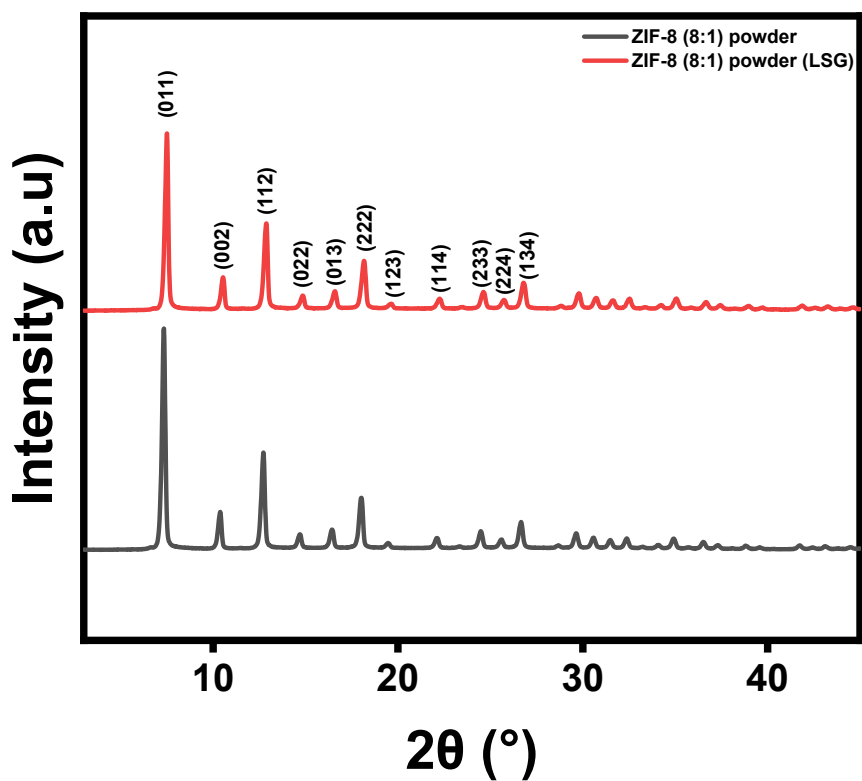

Figure S2 XRD of ZIF-8 powders

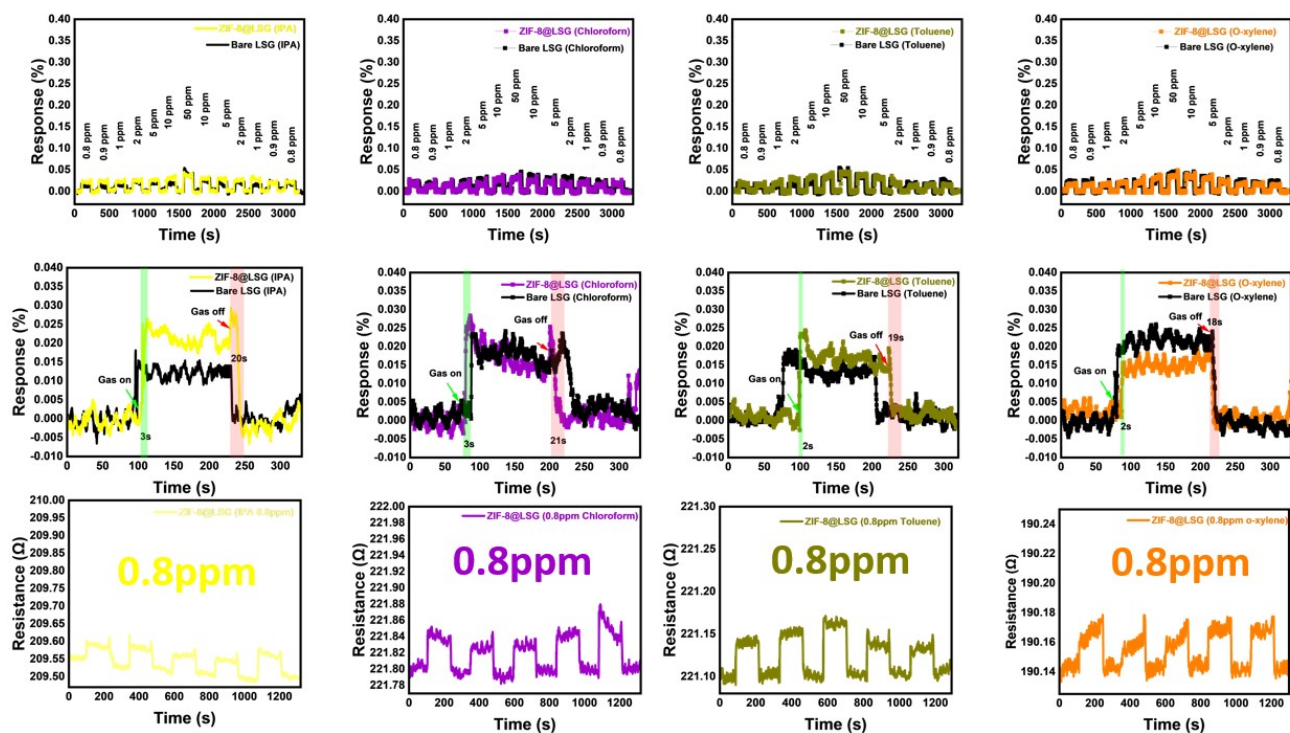

Figure S3 Sensing performance with other VOCs (IPA, Chloroform, Toluene, O-xylene)

**Table T1 Linearity data of ZIF-8@LSG sensor for 8 VOCs from 0.8-10ppm**

| Equation             | $y = a + b*x$     |                     |                      |                      |                      |                        |                         |                      |
|----------------------|-------------------|---------------------|----------------------|----------------------|----------------------|------------------------|-------------------------|----------------------|
|                      | Acetone           | Ethanol             | Methanol             | Formaldehyde         | Chloroform           | IPA                    | Toluene                 | o-Xylene             |
| Intercept (a)        | 0.04307 ± 0.00383 | 0.0741 ± 0.00357    | 0.06355 ± 0.00159    | 0.03809 ± 0.00167    | 0.01935 ± 0.00116    | 0.02376 ± 9.15683E-5   | 0.02104 ± 5.61306E-4    | 0.01884 ± 5.49216E-4 |
| Slope (b)            | 0.00985 ± 0.00103 | 0.00452 ± 6.4496E-4 | 0.00177 ± 2.58891E-4 | 0.00332 ± 4.51699E-4 | 0.00199 ± 2.99043E-4 | 3.30351E-4 ± 2.2982E-5 | 8.88798E-4 ± 6.50811E-5 | 0.00109 ± 1.33768E-4 |
| <b>R<sup>2</sup></b> | <b>0.95815</b>    | <b>0.92476</b>      | <b>0.92155</b>       | <b>0.93106</b>       | <b>0.91692</b>       | <b>0.98101</b>         | <b>0.979</b>            | <b>0.94279</b>       |

**Table T2. Quantitative analysis of Biomarker classification**

| Biomarker    | Classifier | ZIF-8@LSG (0.8-10ppm) |       |       |       |       |       | ZIF-8@LSG (0.8ppm) |       |       |       |       |       |
|--------------|------------|-----------------------|-------|-------|-------|-------|-------|--------------------|-------|-------|-------|-------|-------|
|              |            | SE                    | SP    | ACC   | P     | R     | FS    | SE                 | SP    | ACC   | P     | R     | FS    |
| Methanol     | RBF        | 100                   | 85.71 | 87.50 | 50    | 100   | 66.67 | 100                | 85.71 | 87.50 | 80    | 100   | 66.66 |
|              | MLP        | 100                   | 98.41 | 98.50 | 80.51 | 100   | 89.19 | 100                | 93.75 | 94.53 | 69.56 | 100   | 82.05 |
| O-xylene     | RBF        | 100                   | 85.71 | 87.50 | 50    | 100   | 66.68 | 36.71              | 94.75 | 87.50 | 50    | 36.71 | 42.34 |
|              | MLP        | 100                   | 95.98 | 96.48 | 78.04 | 100   | 87.67 | 99.21              | 93.84 | 94.52 | 69.78 | 99.21 | 81.93 |
| IPA          | RBF        | 48.43                 | 93.08 | 87.50 | 50    | 48.43 | 49.20 | 100                | 85.61 | 87.41 | 49.80 | 100   | 66.49 |
|              | MLP        | 88.28                 | 97.65 | 96.48 | 84.32 | 88.28 | 86.25 | 100                | 93.75 | 94.53 | 69.56 | 100   | 82.05 |
| Toluene      | RBF        | 100                   | 85.71 | 87.50 | 50    | 100   | 66.67 | 100                | 85.71 | 87.50 | 50    | 100   | 66.67 |
|              | MLP        | 100                   | 95.98 | 96.48 | 78.05 | 100   | 87.67 | 100                | 93.75 | 94.53 | 69.56 | 100   | 82.05 |
| Formaldehyde | RBF        | 51.56                 | 92.63 | 87.50 | 50.00 | 51.56 | 50.76 | 100                | 85.71 | 87.50 | 50    | 100   | 66.66 |
|              | MLP        | 96.09                 | 96.54 | 96.48 | 79.87 | 96.09 | 87.23 | 100                | 93.75 | 94.53 | 69.56 | 100   | 82.06 |
| Ethanol      | RBF        | 100                   | 85.71 | 87.50 | 50    | 100   | 66.66 | 100                | 85.71 | 87.50 | 50    | 100   | 66.66 |
|              | MLP        | 91.40                 | 97.20 | 96.48 | 82.39 | 91.40 | 86.67 | 57.03              | 99.88 | 94.53 | 98.64 | 57.03 | 72.27 |
| Chloroform   | RBF        | 100                   | 85.71 | 87.50 | 50    | 100   | 66.67 | 100                | 85.71 | 87.50 | 50    | 100   | 66.66 |
|              | MLP        | 100                   | 95.98 | 96.48 | 78.04 | 100   | 87.67 | 100                | 93.75 | 94.53 | 69.56 | 100   | 82.05 |
| Acetone      | RBF        | 100                   | 85.71 | 87.50 | 50    | 100   | 66.66 | 63.28              | 90.95 | 87.50 | 50    | 63.28 | 55.86 |
|              | MLP        | 96.09                 | 96.54 | 96.48 | 79.87 | 96.09 | 87.23 | 100                | 94.21 | 94.89 | 69.56 | 100   | 82.05 |

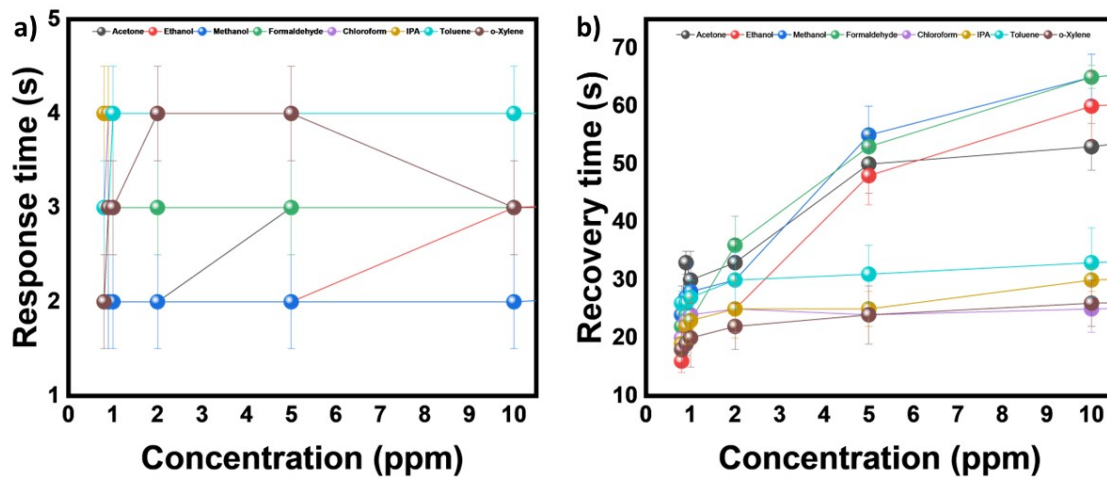

Figure S4 a) Comparative response time of ZIF-8@LSG sensor device for 8 different VOCs at different concentration; b) Recovery time of ZIF-8@LSG sensor device for 8 different VOCs at different concentration. (Colour code: acetone: black; ethanol: red; methanol: blue; formaldehyde: green; chloroform: purple; IPA: orange; toluene: mint blue; o-xylene: brown)

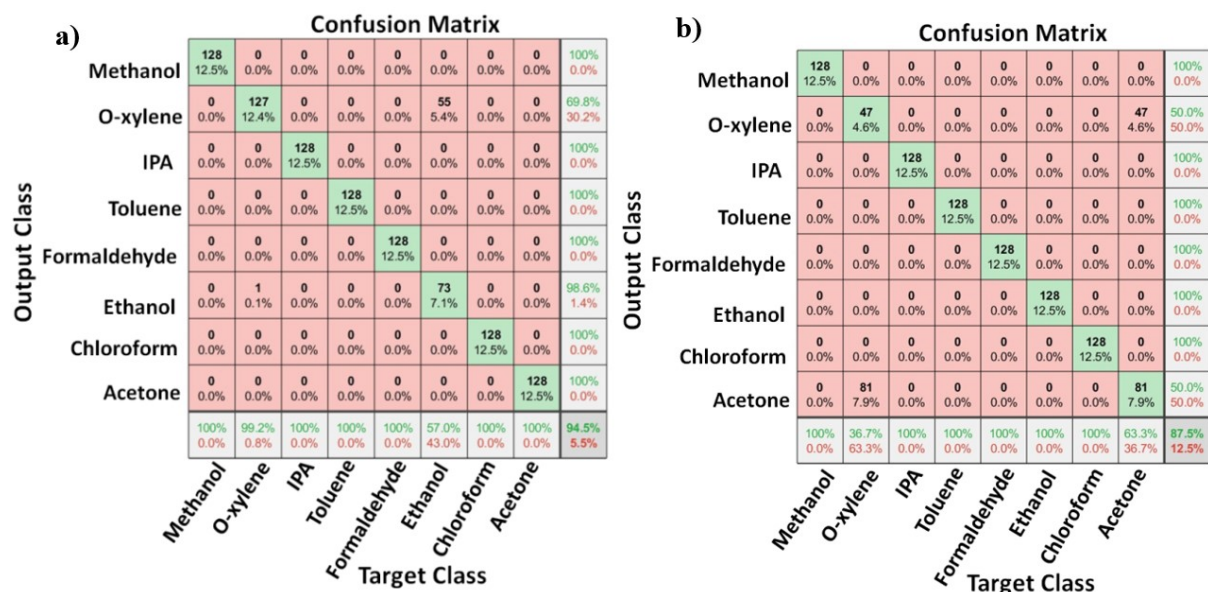

Figure S5 Graph of the test data set confusion matrix using (A) using MLP classifier algorithm for 0.8 ppm, (B) using RBF classifier algorithm for 0.8 ppm.
